# Supplementary material for: Luteolin: A promising natural agent in management of pain in chronic conditions
Source: Frontiers journal article supplement (doi:10.3389/fpain.2023.1114428), 2023-03-01
Supplement: Table_1.docx [file Table_1.docx]

**Luteolin: A Promising Natural Agent in Management of Pain in Chronic Conditions**

**Foteini Ntalouka*, Athina Tsirivakou**

*** Correspondence:** fntalouka@gmail.com

***Supplementary Material***

# Supplementary Table

Table S1 contains a comparative list of all previous studies with the plants that contain luteolin.

| **Family** | **Species** | **Aglycone/Glycoside** | **Rf** |
| --- | --- | --- | --- |
| Anacardiaceae | *Pistacia lentiscus* | luteolin | [107,108] |
| Annonaceae | *Annona tomentosa* | luteolin-7-O-glucoside | [15] |
| Annonaceae | *Cymbopetalum brasiliense* | luteolin-6-hydroxy-7-O-rhamnosylglucoside | [15] |
| Apiaceae | *Cuminum cyminum* | Luteolin 7-galacturonide-4'-glucoside | [109] |
| Apiaceae | *Apium graveolens* | Luteolin 3'-methylether 7-apiosyl-(1->2)-glucoside | [109] |
| Apiaceae | *Angelica keiskei* | cynaroside (luteolin 7-O-D-glucoside) | [110] |
| Apiaceae | *Anthriscus sylvestris* | luteolin-7-O-glucoside | [111] |
| Apiaceae | *Apium graveolens* | luteolin 7-O-apiosylglucoside, luteolin 7-O-glucoside, malonyl derivatives of these glycosides. | [112] |
| Apiaceae | *Bupleurum flavum* | luteolin | [113] |
| Apiaceae | *Chaerophyllum hirsutum* | 6-methylluteolin, luteolin-7-O-beta-D-glucopyranoside | [114] |
| Apiaceae | *Daucus carota* | luteolin, luteolin 3'-O-beta-D-glucopyranoside and luteolin 4'-O-beta-Dglucopyranoside | [115] |
| Apiaceae | *Washingtonia filifera* | luteolin 7-O-glucoside 4''-sulfate (2), luteolin 7-O-glucoside 2''-sulfate | [116] |
| Araceae | *Arum palaestinum* | isoorientin, luteolin | [15] |
| Arecaceae | *Pratia nummularia* | luteolin 7-O-rutinoside, luteolin-7-O-beta-D-rutinoside,luteolin 7-rutinoside | [109] |
| Arecaceae | *Opsiandra maya* | luteolin 7-sulfate-3'-rutinoside | [109] |
| Arecaceae | *Aiphanes aculeata* | luteolin | [117] |
| Arecaceae | *Phoenix dactylifera* | rhamnosyl diglucosyl luteolin, diglucosyl luteolin sulphate, rhamnosyldiglucosyl methyl luteolin, , rhamnosyl glucosyl methyl luteolin, glucosylluteolin sulphate, glucosyl methyl luteolin sulphate | [15] |
| Asclepiadaceae | *Caralluma attenuata* | luteolin-4'-O-neohesperidoside = (luteolin-4'-O-[alpha-(L-rhamnopyranosyl-(1-->2)-beta-D-glucopyranoside)]) | [67] |
| Asclepiadaceae | *Caralluma negevensis* | luteolin 3'-O-beta-D-glucopyranoside-4'-O-alpha-L-rhamnopyranosyl-(1-->2)-beta-D-glucopyra noside, luteolin 3',4'-di-O-beta-D-glucopyranoside | [67] |
| Asclepiadaceae | *Caralluma russeliana* | luteolin 4'-O-beta-D-neohesperidoside. | [15] |
| Asclepiadaceae | *Caralluma tuberculata* | luteolin.4'-beta-D-glucopyranosyl-(2-->1)-alpha-L-rhamnopyranoside | [15] |
| Asclepiadaceae | *Stapelia hirsuta L.* | luteolin-7-O-beta-D-glucopyranoside | [119] |
| Asphodelaceae | *Aloe vera* | luteolin | [120] |
| Aspleniaceae | *Asplenium normale* | luteolin 7-O-dirhamnoside, luteolin 7-O-glucosylrhamnoside | [121] |
| Asteraceae | *Phoenix roebelenii* | luteolin 7-O-rutinoside, luteolin-7-O-beta-D-rutinoside,luteolin 7-rutinoside | [109] |
| Asteraceae | *Launaea nudicaulis* | luteolin 3',7-di-O-beta-glucoside or luteolin 7,3'-diglucoside | [109] |
| Asteraceae | *Launaea nudicaulis* | luteolin 7,4'-diglucoside | [109] |
| Asteraceae | *Vernonia baldwinii* | luteolin 7-galactoside-4'-glucoside | [109] |
| Asteraceae | *Achillea millefolium* | luteolin | [122] |
| Asteraceae | *Achillea nobilis* | luteolin-6-C-apiofuranosyl-(1'''-->2'')-glucoside, orientin, isoorientin, luteolin-luteolin-6-C-apiofuranosyl-(1'''-->2'')-glucoside, orientin, isoorientin, luteolin- 7-O-beta-glucuronide, luteolin-4'-O-beta-glucoside | [15] |
| Asteraceae | *Achillea pannonica* | luteolin-7-O-glucopyranoside, luteolin-7,4'-O-beta-diglucoside | [123] |
| Asteraceae | *Achyrocline satureioides* | luteolin | [15] |
| Asteraceae | *Anthemis chia* | luteolin-7-glucoside | [15] |
| Asteraceae | *Anthemis cretica* | 6- hydroxyluteolin 6- methyl ether, 6- hydroxyluteolin 6,3’ - dimethyl ether,6- hydroxyluteolin 6,7,4’ - trimethyl ether, luteolin-7-glucoside | [15] |
| Asteraceae | *Anthemis monantha* | 6- hydroxyluteolin 6,7,4’ - trimethyl ether, luteolin-7-glucuronide, luteolin-7-glucoside | [15] |
| Asteraceae | *Arnica montana* | luteolin 3'- O-beta-glucoside; | [15] |
| Asteraceae | *Artemisia giraldii* | luteolin | [124] |
| Asteraceae | *Artemisia montana* | luteolin 7-O-rutinoside (scolymoside) | [125] |
| Asteraceae | *Bidens tripartita* | cynaroside, luteolin | [126] |
| Asteraceae | *Carduus crispus* | luteolin-7-glucoside | [127] |
| Asteraceae | *Carduus micropterus* | luteolin | [128] |
| Asteraceae | *Carthamus lanatus* | luteolin 7-O-glucoside | [15] |
| Asteraceae | *Carthamus tinctorius* | luteolin, luteolin 7-O-beta-D-glucopyranoside, luteolin-7-O-(6''-O-acetyl)-beta-D-glucopyranoside | [129] |
| Asteraceae | *Centaurea scoparia* | luteolin | [130] |
| Asteraceae | *Chamomilla recutita* | luteolin, luteolin-7-O-glucoside | [131] |
| Asteraceae | *Chromolaena odorata* | luteolin | [132] |
| Asteraceae | *Chrysanthemum morifolium* | luteolin-7-O-beta-D-glucoside, luteolin | [15] |
| Asteraceae | *Chrysanthemum segetum* | luteolin-7-glucoside | [15] |
| Asteraceae | *Chrysanthemum sinense* | luteolin | [133] |
| Asteraceae | *Cirsium japonicum* | luteolin | [134] |
| Asteraceae | *Cirsium rivulare* | luteolin | [135] |
| Asteraceae | *Conyza bonariensis* | luteolin | [136] |
| Asteraceae | *Cynara scolymus* | luteolin, luteolin-7-O-glucoside, luteolin-7-rutinoside, cynaroside | [15] |
| Asteraceae | *Eclipta alba* | luteolin | [15] |
| Asteraceae | *Erigemn acris* | luteolin | [137] |
| Asteraceae | *Euterpe oleraceae* | orientin | [138] |
| Asteraceae | *Glossogyne tenuifolia* | luteolin, luteolin-7-glucoside | [139] |
| Asteraceae | *Helichrysum compactum* | luteolin, luteolin-7-O-glucoside, luteolin-4',7-di-O-glucoside | [140] |
| Asteraceae | *Helichrysum pamphylicum* | luteolin, luteolin-4’glucoside | [15] |
| Asteraceae | *Inula britannica* | luteolin | [141] |
| Asteraceae | *Ismelia versicolor* | luteolin-7-glucoside, luteolin-7-glucuronide | [15] |
| Asteraceae | *Ixeridium gracile* | luteolin 7-O-glucoside | [142] |
| Asteraceae | *Ixeris denticulata* | luteolin-7-O-glucoside, luteolin-7-O-glucuronide-6'-methyl ester | [143] |
| Asteraceae | *Ixeris sonchifolia* | luteolin, luteolin 7-glucuronide methylester, luteolin 7-glucuronide ethylester,luteolin 7-glucoside, luteolin 7-glucopyranosyl-(1-->6)-glucoside, luteolin 7-glucopyranosyl-(1-->2)-glucoside | [15] |
| Asteraceae | *Lactuca indica* | luteolin, luteolin 7-O-glucuronide | [144] |
| Asteraceae | *Lactuca sativa* | luteolin 7-O-glucuronide | [145] |
| Asteraceae | *Lactuca scariola* | luteolin-7-O-beta-D-glucopyranoside, luteolin | [146] |
| Asteraceae | *Leontodon croceus* | luteolin, luteolin 7-O-beta-D-gentiobioside, luteolin 7-O-beta-D-glucoside, luteolin 7-O-beta-D-glucuronide, luteolin 4'-O-beta-D-glucoside | [15] |
| Asteraceae | *Leontodon duboisii* | luteolin, luteolin 7-O-beta-D-gentiobioside, luteolin 7-O-beta-D-glucoside, luteolin 7-O-beta-D-glucuronide, luteolin 4'-O-beta-D-glucoside | [15] |
| Asteraceae | *Leontodon helveticus* | luteolin, luteolin 7-O-beta-D-gentiobioside, luteolin 7-O-beta-D-glucoside, luteolin 7-O-beta-D-glucuronide, luteolin 4'-O-beta-D-glucoside | [15] |
| Asteraceae | *Leontodon montaniformis* | luteolin, luteolin 7-O-beta-D-gentiobioside, luteolin 7-O-beta-D-glucoside, luteolin 7-O-beta-D-glucuronide | [15] |
| Asteraceae | *Leontodon autumnalis* | luteolin, luteolin 7-O-beta-D-gentiobioside, luteolin 7-O-beta-D-glucoside, luteolin 7-O-beta-D-glucuronide, luteolin 4'-O-beta-D-glucoside | [15] |
| Asteraceae | *Leontodon pyrenaicus* | luteolin, luteolin 7-O-beta-D-gentiobioside, luteolin 7-O-beta-D-glucoside, luteolin 7-O-beta-D-glucuronide, luteolin 4'-O-beta-D-glucoside | [15] |
| Asteraceae | *Leontodon rilaensis* | luteolin, luteolin 7-O-beta-D-gentiobioside, luteolin 7-O-beta-D-glucoside, luteolin 7-O-beta-D-glucuronide, luteolin 4'-O-beta-D-glucoside | [15] |
| Asteraceae | *Leontopodium alpium* | luteolin-7-O-beta-D-glucoside, luteolin-3'-O-beta-D-glucoside, luteolin-4'-O-beta-D-glucoside, 6-hydroxy-luteolin-7-O-beta-D-glucoside, luteolin-7,4'-di-O-beta-D-glucoside | [147] |
| Asteraceae | *Leucanthemum adjustum* | luteolin-7-glucoside, luteolin-7-glucuronide | [15] |
| Asteraceae | *Leucanthemum vulgare* | luteolin-7-glucuronide | [15] |
| Asteraceae | *Lychnophora pohlii* | luteolin | [148] |
| Asteraceae | *Phagnalon rupestre* | luteolin-7-O-beta-glucoside, luteolin-7-O-beta-glucuronide | [149] |
| Asteraceae | *Picnomon acarna* | luteolin-7, 3'-dimethyl ether and luteolin-3'-methyl ether | [150] |
| Asteraceae | *Santolina insularis* | luteolin and luteolin 7-O-beta-D-glucopyranoside | [151] |
| Asteraceae | *Saussurea tridactyla* | luteolin, luteolin-7-O-beta-D-glucoside | [152] |
| Asteraceae | *Scorzonera austriaca* | luteolin 3'-(6-E-p-coumaroyl-beta-d-glucopyranoside) | [15] |
| Asteraceae | *Serratula coronata* | luteolin, luteolin 4'beta-D-glucoside | [153] |
| Asteraceae | *Stevia rebaudiana* | luteolin | [154] |
| Asteraceae | *Tanacetum vulgaris* | luteolin, 6-hydroxyluteolin 6-methyl ether, 6-hydroxyluteolin 6,3'-dimethylether, 6-hydroxyluteolin 6-hydroxyluteolin | [15] |
| Asteraceae | *Tanacetum parthenium* | luteolin 7-glucuronide, luteolin 7-glucoside, luteolin | [15] |
| Asteraceae | *Taraxacum officinale* | luteolin 7-glucoside, luteolin 7-diglucosides, luteolin | [155] |
| Asteraceae | *Tripleurospermum maritimum* | luteolin, luteolin-7-glucoside, luteolin-7-glucuronide | [15] |
| Asteraceae | *Tripleurospermum perforatum* | luteolin, luteolin-7-glucoside | [15] |
| Asteraceae | *Vernoniopsis caudatawith* | luteolin 4'-beta-d-O-glucopyranosyl | [15] |
| Asteraceae | *Wedelia paludosa* | luteolin | [66] |
| Asteraceae | *Youngia japonica* | luteolin-7-O-glucoside | [156] |
| Avicenniaceae | *Avicennia marina* | luteolin 7-O-methylether, luteolin 7-O-methylether 3'-O-beta-D-glucoside, luteolin 7-O-methylether 3'-O-beta-D-galactoside | [66] |
| Balsaminaceae | *Impatiens textori* | luteolin | [158] |
| Begoniaceae | *Begonia malabarica* | luteolin | [15] |
| Berberidaceae | *Epimedium hunanense* | luteolin | [159] |
| Berberidaceae | *Epimedium sagittatum* | luteolin | [160] |
| Bignoniaceae | *Newbouldia laevis* | luteolin | [161] |
| Bignoniaceae | *Tecoma stans Juss.* | luteolin 7-O-beta-D-neohespridoside, luteolin 7-O-beta-D-glucopyranoside | [15] |
| Boraginaceae | *Ehretia ovalifolia* | luteolin | [15] |
| Brassicaceae | *Pratia nummularia* | luteolin 7-O-rutinoside, luteolin-7-O-beta-D-rutinoside,luteolin 7-rutinoside | [109] |
| Brassicaceae | *Brassica napus* | luteolin | [162] |
| Bromeliaceae | *Vriesea sanguinolenta* | 6-hydroxyluteolin-7-O-(1"-alpha-rhamnoside) | [163] |
| Buddlejaceae | *Buddleja globosa* | luteolin-7-O-glucoside | [164] |
| Buddlejaceae | *Buddleja officinalis* | luteolin, luteolin, luteolin-7-O-beta-D-glucopyranoside | [15] |
| Caesalpiniaceae | *Bauhinia tarapotensis* | luteolin 4'-O-beta-D-glucopyranoside | [15] |
| Caesalpiniaceae | *Cassia nigricans* | luteolin | [165] |
| Caesalpiniaceae | *Ceratonia siliqua* | luteolin | [107] |
| Caesalpiniaceae | *Senna petersiana* | luteolin | [166] |
| Caesalpiniaceae | *Senna siamea* | luteolin | [167] |
| Caesalpiniaceae | *Tamarindus indica L.* | luteolin | [168] |
| Campanulaceae | *Capsella bursa-pastoris* | luteolin 7-O-rutinoside, luteolin-7-O-beta-D-rutinoside,luteolin 7-rutinoside | [109] |
| Campanulaceae | *Campanula rotundifolia* | luteolin 7-gentiobioside | [109] |
| Campanulaceae | *Campanula patula* | luteolin 7-(3'''-acetylapiosyl-(1->2)-xyloside) | [109] |
| Campanulaceae | *Lobelia chinensis* | luteolin | [169] |
| Campanulaceae | *Platycodon grandiflorum* | luteolin, luteolin 7-O-glucoside | [15] |
| Cannabaceae | *Cannabis sativa* | orientin, luteolin-7-O-beta-D-glucuronide | [170] |
| Capparaceae | *Capparis himalayensis* | luteolin | [171] |
| Capparaceae | *Capparis spinosa* | luteolin 7-O-glucoside, luteolin | [172] |
| Caprifoliaceae | *Lonicera confusa* | luteolin | [173] |
| Caprifoliaceae | *Lonicera japonica* | luteolin, luteolin 7-O-beta-D-glucopyranoside | [15] |
| Caryophyllaceae | *Dacrydium spp.* | luteolin 7-arabinopyranosyl-(1->6)-glucoside | [174] |
| Caryophyllaceae | *Dianthus chinensis* | isoorientin-2"-O-glucoside | [175] |
| Caryophyllaceae | *Gypsophila repens* | luteolin-7-O-alpha-L-arabinopyranosyl-6-C-beta-glucopyranoside | [15] |
| Caryophyllaceae | *Lychnis flos-cuculi* | luteolin, luteolin 8-C-beta-D: -glucopyranoside | [15] |
| Cecropiaceae | *Cecropia lyratiloba* | isoorientin | [15] |
| Cecropiaceae | *Cecropia obtusifolia* | isoorientin | [176] |
| Chenopodiaceae | *Cornulaca monacantha* | luteolin-7-O-rhamnoside, luteolin-7-O-glucoside | [177] |
| Clusiaceae | *Hypericum brasiliense* | luteolin | [178] |
| Clusiaceae | *Hypericum perforatum* | isoorientin | [179] |
| Colchicaceae | *Colchicum speciosum* | luteolin 7-laminaribioside | [109] |
| Colchicaceae | *Colchicum cilicicum* | luteolin | [180] |
| Combretaceae | *Terminalia arjuna* | luteolin | [181] |
| Combretaceae | *Terminalia chebula retz.* | luteolin | [182] |
| Combretaceae | *Terminalia myriocarpa* | orientin, isoorientin | [183] |
| Commelinaceae | *Commelina communis* | orientin, isoorientin | [15] |
| Conocephalaceae | *Conocephalum Coicum* | luteolin 7-glucuronide-4'-rhamnoside | [109] |
| Cucurbitaceae | *Cucumis sativus* | luteolin-8-C-beta-D-glucopyranoside (orientin), luteolin-6-C-beta-Dglucopyranoside (isoorientin) | [15] |
| Cucurbitaceae | *Luffa cylindrica* | luteolin-7-O-beta-D-glucuronide methyl ester | [184] |
| Cucurbitaceae | *Sechium edule* | luteolin glycosides | [185] |
| Cynomoriaceae | *Cynomorium songaricum* | luteolin | [186] |
| Cyperaceae | *Cyperus alopecuroides* | luteolin 5,3'-dimethylether, orientin | [15] |
| Cyperaceae | *Cyperus conglomeratus* | luteolin, luteolin 7-methyl ether | [15] |
| Dicranaceae | *Dicranum scoparium* | luteolin-7-O-neohesperidoside | [187] |
| Equisetaceae | *Equisetum arvense* | luteolin | [188] |
| Euphorbiaceae | *Chrozophora brocchiana* | luteolin 7-O-glucoside | [189] |
| Euphorbiaceae | *Glochidion zeylanicum* | isoorientin | [190] |
| Euphorbiaceae | *Jatropha cilliata* | isoorientin and orientin | [15] |
| Euphorbiaceae | *Phyllanthus emblica* | luteolin-4'-O-neohesperiodoside | [191] |
| Fabaceae | *Vicia balansae* | luteolin 7,4'-diglucoside | [109] |
| Fabaceae | *Dalbergia monetarya* | luteolin 3'-methylether 7-apiosyl-(1->2)-glucoside | [109] |
| Fabaceae | *Cajanus cajan* | luteolin | [192] |
| Fabaceae | *Crotalaria sessiliflora* | isoorientin, orientin | [193] |
| Fabaceae | *Dioclea lasiophylla* | luteolin 3'beta-D-glucopyranoside | [194] |
| Fabaceae | *Spartium junceum L.* | luteolin 4'-beta-glucoside | [195] |
| Flacourtiaceae | *Homalium brachybotrys* | luteolin-7-O-beta-glucopyranoside | [196] |
| Flacourtiaceae | *Hydnocarpus wightiana* | luteolin | [197] |
| Gentianaceae | *Gentiana algida* | orientin | [15] |
| Gentianaceae | *Gentiana arisanensis* | luteolin-7-O-beta-D-glucoside, isoorientin-6"-O-glucoside | [15] |
| Gentianaceae | *Gentiana olivieri* | isoorientin | [198] |
| Gentianaceae | *Gentiana piasezkii* | isoorientin, luteolin | [199] |
| Gentianaceae | *Gentianella nitida* | isoorientin | [200] |
| Gentianaceae | *Lisianthius nigrescens* | luteolin 8-C-glucoside | [201] |
| Gentianaceae | *Swertia punctata* | isoorientin | [15] |
| Geraniaceae | *Biebersteinia orphanidis* | luteolin | [202] |
| Geraniaceae | *Pelargonium reniforme* | 2''-O-galloylisoorientin | [15] |
| Ginkgoaceae | *Ginkgo biloba* | luteolin | [15] |
| Globulariaceae | *Globularia alypum* | 6-hydroxyluteolin 7-O-laminaribioside, 6-hydroxyluteolin 7-O-beta-Dglucopyranoside, luteolin 7-O-sophoroside | [15] |
| Hedwigiaceae | *Hedwigia ciliata* | luteolin 7-O-Neohesperidoside-4'-O-sophoroside | [15] |
| Hydrocharitaceae | *Elodea canadensis* | luteolin 7-glucuronosyl-(1->2)-glucuronide | [109] |
| Hydrocharitaceae | *Elodea nuttallii* | luteolin-7-O-diglucuronide | [203] |
| Jubulaceae | *Frullania dilatata* | luteolin 7,4'-diglucoside | [109] |
| Labiatae | *Sideritis maura* | luteolin 7-allosyl-(1->2)-glucoside | [109] |
| Labiatae | *Salvia triloba* | luteolin 7-glucuronide-3'-glucoside | [204] |
| Labiatae | *Glechoma hederacea* | luteolin 7-O-beta-D-glucopyranoside | [205] |
| Labiatae | *Lycopus lucidus* | luteolin, luteolin-7-O-beta-D-glucuronide methyl ester | [206] |
| Labiatae | *Salvia palaestina* | luteolin, luteolin glycosides | [207] |
| Labiatae | *Salvia sclarea* | luteolin | [208] |
| Lamiaceae | *Thymus membraneceus* | luteolin 7- sambubioside | [109] |
| Lamiaceae | *Saussurea medusa* | luteolin 7-O-rutinoside, luteolin-7-O-beta-D-rutinoside, luteolin 7-rutinoside | [109] |
| Lamiaceae | *Ajuga genevensis* | luteolin | [209] |
| Lamiaceae | *Ajuga reptans* | luteolin | [210] |
| Lamiaceae | *Ballota nigra* | luteolin-7-lactate, luteolin-7-glucosyl-lactate | [15] |
| Lamiaceae | *Coleus parvifolius* | luteolin, luteolin 5-O-beta-d-glucopyranoside, luteolin 7-methyl ether, luteolin 5-O-beta-d-glucuronide, 5-O-beta-d-glucopyranosyl-luteolin 7-methyl ether | [211] |
| Lamiaceae | *Dracocephalum subcapitatum* | luteolin | [212] |
| Lamiaceae | *Elsholtzia blanda* | luteolin | [213] |
| Lamiaceae | *Elsholtzia bodinieri* | luteolin 7-O-[6''-(3'''-hydroxy-4'''-methoxy cinnamoyl)]-beta-Dglucopyranoside | [15] |
| Lamiaceae | *Elsholtzia rugulosa* | luteolin, luteolin 3'-glucuronyl acid methyl ester | [214] |
| Lamiaceae | *Lamiophlomis rotata* | luteolin-7-O-glucoside, luteolin | [215] |
| Lamiaceae | *Lavandula stoechas* | luteolin 7-O-glucoside | [216] |
| Lamiaceae | *Lepechinia graveolens* | luteolin-7-O-glucuronide | [217] |
| Lamiaceae | *Leucas cephalotes* | luteolin 4'-O-beta-D-glucuronopyranoside | [15] |
| Lamiaceae | *Lycopus europaeus* | luteolin-7-glucoside, luteolin-7-glucuronide | [218] |
| Lamiaceae | *Lycopus virginicus* | luteolin | [219] |
| Lamiaceae | *Melissa officinalis* | luteolin, luteolin 7-O-beta-D-glucopyranoside, luteolin 7-O-beta-Dglucuronopyranoside, luteolin 3'-O-beta-D-glucuronopyranoside, luteolin 7-O-beta-D-glucopyranoside-3'-Obeta-D-glucuronopyranoside | [15] |
| Lamiaceae | *Mentha x piperita* | luteolin-7-O-rutinoside | [15] |
| Lamiaceae | *Nepeta cataria* | luteolin 7-O-glucuronide, luteolin 7-O-glucurono-(1-->6)-glucoside, luteolin | [220] |
| Lamiaceae | *Nepeta sibthorpii* | luteolin-7-O-glucoside | [15] |
| Lamiaceae | *Ocimum gratissimum* | luteolin | [221] |
| Lamiaceae | *Ocimum sanctum* | luteolin-7-O-beta-D-glucuronic acid 6''-methyl ester, luteolin-7-O-beta-Dglucopyranoside, luteolin-5-O-beta-D-glucopyranoside | [15] |
| Lamiaceae | *Origanum vulgare* | luteolin | [222] |
| Lamiaceae | *Perilla frutescens* | luteolin, luteolin 7-O-glucuronide-6"-methyl ester | [15] |
| Lamiaceae | *Perilla ocimoides* | luteolin 7-0-(glucuronosyl(beta-l-->-2-glucuronide) | [223] |
| Lamiaceae | *Phlomis aurea* | luteolin-7-O-beta-glucopyranoside | [224] |
| Lamiaceae | *Phlomis brunneogaleata* | luteolin 7- O-beta- D-glucopyranoside | [225] |
| Lamiaceae | *Phlomis lunariifolia* | luteolin 7-O-[4-O-acetyl-alpha-rhamnopyranosyl-(1-->2)]-betaglucuronopyranoside | [226] |
| Lamiaceae | *Rosmarinus officinalis* | luteolin 3'-O-beta-D-glucuronide, luteolin 3'-O-(4"-O-acetyl)-beta-Dglucuronide,luteolin 3'-O-(3"-O-acetyl)-beta-D-glucuronide | [15] |
| Lamiaceae | *Salvia officinalis* | luteolin 7-O-beta-D-glucoside, luteolin 7--O-beta-D-glucuronide, luteolin 3'-O-beta-D-glucuronide, 6-hydroxyluteolin 7-O-beta-D-glucoside, 6-hydroxyluteolin 7-O-glucuronide | [15] |
| Lamiaceae | *Satureja obovata* | luteolin | [227] |
| Lamiaceae | *Satureja parvifolia* | luteolin | [15] |
| Lamiaceae | *Schizonepeta tenuifolia* | luteolin | [228] |
| Lamiaceae | *Scutellaria barbata* | luteolin | [229] |
| Lamiaceae | *Scutellaria species* | luteolin | [15] |
| Lamiaceae | *Teucrium species* | luteolin | [230] |
| Lamiaceae | *Thymus broussonettii* | luteolin, luteolin-7-O-glucoside, luteolin-3'-O-glucuronide | [15] |
| Lamiaceae | *Thymus piperella* | luteolin-7- O-beta- D-glucoside | [15] |
| Lamiaceae | *Thymus vulgaris* | luteolin 7-glucuronide | [231] |
| Lamiaceae | *Thymus willdenowii* | luteolin-3'-O-glucuronide | [232] |
| Lamiaceae | *Vitex agnus-castus* | luteolin 6-C-(4"-methyl-6"-O-trans-caffeoylglucoside), luteolin 6-C-(6"-Otrans-caffeoylglucoside), luteolin 6-C-(2"-O-trans-caffeoylglucoside), luteolin 7-O-(6"-p-benzoylglucoside), luteolin, orientin | [15] |
| Lamiaceae | *Vitex polygama* | orientin, isoorientin | [15] |
| Lamiaceae | *Vitex rotundifolia* | luteolin | [233] |
| Lamiaceae | *Zataria multiflora* | luteolin | [234] |
| Ledocarpaceae | *Balbisia calycina* | luteolin | [235] |
| Leguminosae | *Aspalathus linearis* | luteolin, orientin | [15] |
| Leguminosae | *Cyclopia subternata* | luteolin | [236] |
| Leguminosae | *Genista corsica* | luteolin, luteolin 4'-O-beta-glucoside, luteolin 7-O-beta-glucoside | [237] |
| Leguminosae | *Genista morisii* | luteolin, luteolin 7-O-beta-D-glucopyranoside, luteolin 4'-O-beta-Dglucopyranoside | [15] |
| Leguminosae | *Genista tenera* | luteolin-7-O-glucoside, luteolin-7,3'-di-O-glucoside | [238] |
| Leguminosae | *Glycine soja* | luteolin, luteolin-7-O-beta-D-glucoside | [239] |
| Leguminosae | *Kummerowia striata* | luteolin 4'-O-glucopyranoside | [240] |
| Leguminosae | *Medicago sativa* | luteolin, luteolin 7-O-[2-O-feruloyl-beta-D-glucuronopyranosyl(1-->2)-Obeta-D-glucuronopyranosyl]-4 '-O-beta-D-glucuronopyranoside, luteolin 7-O-beta-D-glucuronopyranoside | [15] |
| Leguminosae | *Medicago truncatula* | luteolin 7-O-[beta-D-glucuronopyranosyl-(1-->2)]-O-beta-Dglucuronopyranoside,luteolin 7-O-beta-D-glucuronopyranoside | [241] |
| Leguminosae | *Retama raetam* | luteolin 4'-O-neohesperidoside | [242] |
| Leguminosae | *Retama sphaerocarpa* | orientin | [243] |
| Lythraceae | *Cuphea pinetorum* | luteolin-7-O-beta-D-glucopyranoside | [15] |
| Lythraceae | *Lawsonia inermis* | luteolin | [244] |
| Lythraceae | *Lythrum salicaria* | isoorientin, orientin | [245] |
| Lythraceae | *Punica granatum* | luteolin | [246] |
| Malvaceae | *Abutilon indicum* | luteolin, luteolin 7-O-beta-glucopyranoside | [247] |
| Malvaceae | *Kitaibelia vitifolia* | luteolin | [248] |
| Marchantiaceae | *Marchantia polymorpha* | luteolin 7,3'- diglucuronide | [109] |
| Marchantiaceae | *Marchantia berteroana* | luteolin 7,3'-digalacturonide, luteolin 3',4'- digalacturonide | [249] |
| Marchantiaceae | *Marchantia polymorpha* | luteolin 7,4'-diglucuronide | [109] |
| Melanthiaceae | *Japonolirion osense* | isoorientin, orientin | [250] |
| Melastomataceae | *Leandra lacunosa* | luteolin | [15] |
| Mimosaceae | *Albizzia julibrissin* | luteolin | [15] |
| Monocleaceae | *Monoclea forsteri* | 6-methoxyluteolin 7-O-[2-O-alpha-rhamnosyl-3-O-alpha-arabinosyl-betaglucuronide]-4'-O-[2-O-alpha-r hamnosyl-3-O-beta-xylosyl-betaglucuronide],6-methoxyluteolin 7-O-[2-O-alpha-rhamnosyl-betaglucuronide]-4'-O-[2-O-alpha-rhamnosyl-3-O-beta-xylosyl-betaglucuronide]. | [251] |
| Moraceae | *Broussonetia papyrifera* | luteolin | [15] |
| Moraceae | *Ficus carica* | luteolin | [107] |
| Ochnaceae | *Lophira alata* | luteolin | [252] |
| Oleaceae | *Ligustrum vulgare* | luteolin, luteolin 7-O-glucoside | [253] |
| Oleaceae | *Olea europaea* | luteolin, luteolin-4'-O-glucoside, luteolin-7-O-glucoside | [15] |
| Oleaceae | *Phillyrea latifolia* | luteolin, luteolin 7-O-glucoside, luteolin 4’-O-glucoside | [253] |
| Ophioglossaceae | *Lunularia cruciata* | luteolin 3',4'- diglucuronide | [109] |
| Ophioglossaceae | *Ophioglossum petiolatum* | luteolin | [254] |
| Orchidaceae | *Listera ovata* | luteolin 3',4'- diglucoside | [255] |
| Oxalidaceae | *Oxalis corniculata* | isoorientin | [256] |
| Oxalidaceae | *Oxalis triangularis* | luteolin 6-C-(2''-O-beta-xylopyranosyl-beta-glucopyranoside) | [15] |
| Paeoniaceae | *Paeonia suffruticosa* | luteolin-7-O-glucoside | [257] |
| Papaveraceae | *Papaver rhoeas* | luteolin | [258] |
| Passifloraceae | *Passiflora alata* | 2’’-rhamnosyl-orientin, isoorientin, orientin | [15] |
| Passifloraceae | *Passiflora caerulea* | isoorientin, orientin | [15] |
| Passifloraceae | *Passiflora edulis* | luteolin -7-O-[2-rhamnosylglucoside], isoorientin, orientin, luteolin glycosides | [259] |
| Passifloraceae | *Passiflora incarnata* | isoorientin-2''-O-glucopyranoside, isoorientin, orientin | [15] |
| Piperaceae | *Piper solmsianum* | orientin | [260] |
| Plantaginaceae | *Veronicastrum sibir-icum* | Lonicerin / luteolin 7- neohesperidoside | [109] |
| Plantaginaceae | *Penstemon gentianoides* | luteolin | [261] |
| Plantaginaceae | *Plantago lagopus* | luteolin-7-O-beta-glucoside | [15] |
| Plantaginaceae | *Plantago lanceolata* | luteolin | [262] |
| Plantaginaceae | *Plantago maritima* | luteolin | [263] |
| Poaceae | *Cymbopogon citraee* | Lonicerin / luteolin 7- neohesperidoside | [109] |
| Poaceae | *Cymbopogon citratus* | isoorientin, isoorientin 2' '-O-rhamnoside, orientin | [264] |
| Poaceae | *Deschampsia antarctica* | luteolin, orientin, orientin 2''-O-arabinopyranoside, isoswertiajaponin (7-Omethylorientin),isoswertiajaponin 2''-O-beta-arabinopyranoside | [15] |
| Poaceae | *Deschampsia borealis* | orientin | [15] |
| Poaceae | *Digitaria exilis* | luteolin | [265] |
| Poaceae | *Echinochloa utilis* | luteolin | [266] |
| Poaceae | *Hordeum vulgare* | isoorientin, , isoorientin-7-O-glucoside | [15] |
| Poaceae | *Phyllostachys nigra* | luteolin-7-O-glucoside, luteolin 6-C-(6''-O-trans-caffeoylglucoside) | [15] |
| Poaceae | *Pogonatherum crinitum* | luteolin 6-C-beta-boivinopyranoside, luteolin, luteolin 6-C-betafucopyranoside, luteolin 6-C-beta-glucopyranoside | [267] |
| Poaceae | *Saccharum officinarum* | orientin, luteolin-8-C-(rhamnosylglucoside), 4',5'-dimethyl-luteolin-8-Cglycoside | [268] |
| Poaceae | *Sasa borealis* | isoorientin, isoorientin 2"-O-alpha-L-rhamnoside | [15] |
| Poaceae | *Secale cereale* | luteolin 7-O-diglucuronyl-4'-O-glucuronide, luteolin 7-O-diglucuronide | [269] |
| Poaceae | *Setaria viridis* | orientin 2''-O-xyloside | [270] |
| Poaceae | *Triticum durum* | luteolin glycosides | [271] |
| Podocarpaceae | *Dacrydium spp.* | luteolin 7- arabinofuranosyl-(1- >6)-glucoside | [109] |
| Podocarpaceae | *Podocarpus Nivalis* | luteolin 7-glucoside-3'- xyloside | [109] |
| Polygonaceae | *Fagopyrum esculentum* | isoorientin, orientin | [272] |
| Polygonaceae | *Fallopia species* | luteolin glycosides | [273] |
| Polygonaceae | *Rumex induratus* | 6-C-hexosyl-luteolin | [15] |
| Polygonaceae | *Rumex luminiastrum* | orientin | [15] |
| Potamogetonaceae | *Potamogeton ssp* | isoorientin, luteolin 7- O-glucoside, luteolin 7-O-glucuronide, luteolin 3’-Oglucoside, luteolin | [274] |
| Pteridaceae | *Pteris cretica* | luteolin 8-C-rhamnoside-7-O-rhamnoside, luteolin 7-O-robinobioside, luteolin 7-O-rutinoside, luteolin 7-O-glucoside | [15] |
| Pteridaceae | *Pteris multifida* | luteolin 7-Omicron-beta-D: -glucopyranoside, luteolin | [15] |
| Ranunculaceae | *Aquilegia ecalcarata* | luteolin | [275] |
| Ranunculaceae | *Aquilegia vulgaris* | luteolin derivatives | [15] |
| Ranunculaceae | *Ficaria verna* | luteolin 8-C-beta-D-glucopyranoside | [276] |
| Ranunculaceae | *Trollius chinensis* | orientin | [15] |
| Ranunculaceae | *Trollius ledibouri* | orientin | [15] |
| Resedaceae | *Reseda luteola* | luteolin 3',7-di-O-beta-glucoside or luteolin 7,3'- diglucoside | [109] |
| Ricciaceae | *Riccia fluitans* | luteolin 7-glucuronide- 3'-glucoside | [109] |
| Rosaceae | *Chaenomeles sinensis* | luteolin-7-O-beta-D-glucuronide, luteolin-3'-methoxy-4'-O-beta-Dglucopyranoside, luteolin-7-O-beta-D-glucuronide methyl ester | [15] |
| Rosaceae | *Crataegus oxyacantha* | luteolin, luteolin-3', 7-diglucoside | [15] |
| Rosaceae | *Crataegus pentagyna* | isoorientin, orientin, isoorientin-2''-O-rhamnoside, orientin-2''-O-rhamnoside | [15] |
| Rosaceae | *Crataegus x macrocarpa* | luteolin-7-O-beta-D-glucuronide | [277] |
| Rosaceae | *Potentilla multifida* | luteolin-7-O-beta-D-glucuronide | [278] |
| Rubiaceae | *Morinda citrifolia* | luteolin | [279] |
| Rubiaceae | *Morinda morindoides* | luteolin, luteolin-7-O-glucoside | [280] |
| Rutaceae | *Citrus bergamia* | orientin 4'-methyl ether | [281] |
| Salicaceae | *Salix gilgiana* | luteolin-7-O-beta-D-glucuronopyranoside, luteolin | [282] |
| Salicaceae | *Salix matsudana* | luteolin-7-O-d-glucoside, luteolin 7-O-beta-D-glucopyranuronide | [15] |
| Sapindaceae | *Allophyllus edulis* | isoorientin 2"-O-rhamnoside, orientin 2"-O-rhamnoside | [283] |
| Scrophulariaceae | *Bacopa monnieri* | luteolin, luteolin-7-O-beta-glucopyranoside | [15] |
| Scrophulariaceae | *Brandisia hancei* | luteolin | [284] |
| Scrophulariaceae | *Hebe parviflora* | luteolin-7-O-beta-glucoside, luteolin-3’-O-beta-glucoside, luteolin-7, 3’-di-O-beta-glucoside, luteolin-4’-O-beta-glucoside, luteolin-7-O-betaglucuronide,8-hydroxyluteolin-8-beta-glucoside, 8-hydroxyluteolin-7-betaglucoside,6-hydroxyluteolin-7-O-beta-[2-O-beta-xyloglucoside], 6-hydroxyluteolin-7-O-beta-[6-O-beta-xyloglucoside], luteolin-7-O-beta-[6-Oalpha-rhamnosylglucoside], luteolin-7-O-beta-[6-O-beta-xyloglucoside], 4’-O-methylluteolin-7-O-beta-[6-O-beta-xyloglucoside] | [15] |
| Scrophulariaceae | *Hebe stenophylla* | luteolin-7-O-beta-glucoside, luteolin-4’-O-beta-glucoside, 8-hydroxyluteolin-8-beta-glucoside, 8-hydroxyluteolin-7-beta-glucoside, 6-hydroxyluteolin-7-beta-glucoside, 6-hydroxyluteolin-7-O-beta-[2-O-betaxyloxyloside],6-hydroxyluteolin-7-O-beta-[2-O-beta-xyloglucoside], 6-hydroxyluteolin-7-O-beta-[2-O-beta-glucoglucoside], 6-hydroxyluteolin-7-O-beta-[6-O-beta-xyloglucoside] | [15] |
| Scrophulariaceae | *Hebe strictissima* | luteolin-7-O-beta-glucoside, luteolin-4’-O-beta-glucoside, , luteolin-7-Obeta-glucuronide, 8-hydroxyluteolin-7-beta-glucoside, 6-hydroxyluteolin-7-O-beta-[2-O-beta-xyloglucoside], 6-hydroxyluteolin-7-O-beta-[6-O-betaxyloglucoside],luteolin-7-O-beta-[6-O-alpha-rhamnosylglucoside], luteolin-7-O-beta-[6-O-beta-xyloglucoside] | [15] |
| Scrophulariaceae | *Hebe traversti* | luteolin-7-O-beta-glucoside, luteolin-7, 3’-di-O-beta-glucoside, luteolin-4’-O-beta-glucoside, 8-hydroxyluteolin-8-beta-glucoside, 8-hydroxyluteolin-7-beta-glucoside, 6-hydroxyluteolin-7-O-beta-[2-O-beta-xyloxyloside], 6-hydroxyluteolin-7-O-beta-[2-O-beta-xyloglucoside], 6-hydroxyluteolin-7-Obeta-[2-O-beta-glucoglucoside], 4’-O-methylluteolin-7-O-beta-[6-O-betaxyloglucoside] | [15] |
| Scrophulariaceae | *Isoplexis chalcantha* | luteolin, luteolin 7- O-beta- D-glycoside | [285] |
| Scrophulariaceae | *Striga lutea* | luteolin | [286] |
| Scrophulariaceae | *Striga orobanchioides* | luteolin | [287] |
| Scrophulariaceae | *Torenia fournieri* | luteolin-7-O-beta-glucoside | [288] |
| Scrophulariaceae | *Verbascum salviifolium* | luteolin 7-O-glucoside, luteolin 3'-O-glucoside | [15] |
| Scrophulariaceae | *Veronica chamaedrys* | luteolin, apigenin, luteolin-3'-methyl ether | [15] |
| Scrophulariaceae | *Veronica thymoides* | luteolin 7-O-beta-glucopyranoside | [289] |
| Simaroubaceae | *Ailanthus excelsa* | luteolin | [290] |
| Solanaceae | *Capsicum annuum* | luteolin 7-O-beta-D-apiofuranosyl-(1-->2)-beta-D-glucopyranoside, luteolin 7-O-[2-(beta-d-apiofuranosyl)-4-(beta-d-glucopyranosyl)-6-malonyl]-betad-glucopyranoside, malonyl)-glucopyranoside, luteolin 6-C-beta-D-glucopyranoside-8-C-alpha-luteolin-7-O-(2-apiofuranosyl-4-glucopyranosyl-6-malonyl)-glucopyranoside, luteolin 6-C-beta-D-glucopyranoside-8-C-alpha-L-arabinopyranoside | [15] |
| Sterculiaceae | *Theobroma cacao* | luteolin, luteolin 7-O-glucoside, orientin, isoorientin | [291] |
| Thymelaeaceae | *Daphne genkwa* | luteolin, luteolin 7-methyl ether | [292] |
| Thymelaeaceae | *Daphne gnidium* | luteolin-3',7-di-O-glucoside | [293] |
| Thymelaeaceae | *Gnidia involucrata* | isoorientin | [294] |
| Turneraceae | *Turnera diffusa* | luteolin 8-C-E-propenoic acid (1), luteolin 8-C-beta-[6-deoxy-2-O-(alpha-lrhamnopyranosyl)-xylo-hexopyranos-3-uloside] | [295] |
| Umbelliferae | *Dystaenia takeshimana* | luteolin | [296] |
| Urticaceae | *Urtica laetevirens* | luteolin 7-O-neohesperidoside, luteolin 7-O-beta-D: -glucopyranoside, 5-methoxyluteolin 7-O-beta-D: -glucopyranoside | [15] |
| Valerianaceae | *Patrinia villosa* | isoorientin | [15] |
| Verbenaceae | *Lippia alba* | luteolin-7-diglucuronide | [15] |
| Verbenaceae | *Verbena officinalis* | luteolin 7-diglucuronide | [15] |
| Verbenaceae | *Aloysia triphylla* | luteolin 7-diglucuronide | [15] |
| Violaceae | *Viola tricolor* | luteolin-6-C-hexoside, luteolin-6-C-deoxyhexoside-8-C-hexoside, luteolin-6-C-hexoside-8-C-deoxyhexoside | [15] |
| Violaceae | *Viola yedoensis* | luteolin 6-C-beta-D-glucopyranoside (isoorientin), luteolin 6-C-alpha-Larabinopyranosyl-8-C-beta-D-glucopyranoside (isocarlinoside) | [15] |
| Vitaceae | *Cayratia japonica* | luteolin, luteolin-7-O-beta-D-glucopyranoside | [15] |
| Zosteraceae | *Zostera marina* | luteolin | [15] |

References:

107. Vaya J, Mahmood S. Flavonoid content in leaf extracts of the fig (Ficus carica

L.), carob (Ceratonia siliqua L.) and pistachio (Pistacia lentiscus L.). BioFactors. (2006)

28:169–75. doi: 10.1002/biof.5520280303

108. Seeram NP, Zhang Y, Henning SM, Lee R, Niu Y, Lin G, et al. Pistachio skin

phenolics are destroyed by bleaching resulting in reduced antioxidative capacities.

J Agric Food Chem. (2006) 54(19):7036–40. doi: 10.1021/jf0614948

109. Manzoor M, Ahmad N, Manzoor A, Kalsoom A. Food based phytochemical

luteolin their derivatives, sources and medicinal benefits. International Journal of

Agricultural ad Life Sciences. (2017) 3(2):195–207. doi: 10.22573/spg.ijals.017.

s12200084

110. Park JC, Park JG, Kim HJ, Hur JM, Lee JH, Sung NJ, et al. Effects of extract

from Angelica keiskei and its component, cynaroside, on the hepatic

bromobenzene-metabolizing enzyme system in rats. Phytother Res. (2002) 16(Suppl.

1:S24-7). doi: 10.1002/ptr.783

111. Dall’Acqua S, Giorgetti M, Cervellati R, Innocenti G. Deoxypodophyllotoxin

content and antioxidant activity of aerial parts of Anthriscus sylvestris hoffm.

Zeitschrift fur Naturforschung - Section C Journal of Biosciences. (2006) 61(9–

10):658–62. doi: 10.1515/znc-2006-9-1008

112. Lin LZ, Lu S, Harnly JM. Detection and quantification of glycosylated flavonoid

malonates in celery, Chinese celery, and celery seed by LC-DAD-ESI/MS. J Agric Food

Chem. (2007) 55(4):1321–6. doi: 10.1021/jf0624796

113. Pistelli L, Noccioli C, Giachi I, Dimitrova B, Gevrenova R, Morelli I, et al.

Lupane-triterpenes from Bupleurum flavum. Nat Prod Res. (2005) 19(8):783–8.

doi: 10.1080/14786410500045119

114. Dall’Acqua S, Innocenti G. Antioxidant compounds from Chaerophyllum

hirsutum extracts. Fitoterapia. (2004) 75(6):592–5. doi: 10.1016/j.fitote.2004.05.007

115. Shalaby NMM, Maghraby AS, El-Hagrassy AM. Effect of Daucus carota var.

boissieri extracts on immune response of schistosoma mansoni infected mice. Folia

Microbiol. (1999) 44(4):441–8. doi: 10.1007/BF02903720. Available at: http://w’aw.

biolned,cas.cz/tabu/folia/

116. El-Sayed NH, Ammar NM, Al-Okbi SY, El-Kassem ALT, Mabry TJ.

Antioxidant activity and two new flavonoids from Washingtonia filifera. Nat Prod

Res. (2006) 20(1):57–61. doi: 10.1080/1478641500059276

117. Lee D, Cuendet M, Schunke Vigo J, Graham JG, Cabieses F, Fong HHS, et al. A

novel cyclooxygenase-inhibitory stilbenolignan from the seeds of Aiphanes aculeata.

Org Lett. (2001) 3(14):2169–70. doi: 10.1021/ol015985j

118. Bader A, Braca A, de Tommasi N, Morelli I. Further constituents from

Caralluma negevensis. Phytochemistry. (2003) 62(8):1277–81. doi: 10.1016/S0031-

9422(02)00678-7

119. Shabana M, Gonaid M, Salama MM, Abdel-Sattar E. Phenylalkylamine

alkaloids from Stapelia hirsuta L. Nat Prod Res. (2006) 20(8):710–4. doi: 10.1080/

14786410500137718

120. Keyhanian S, Stahl-Biskup E. Phenolic constituents in dried flowers of Aloe

vera (Aloe barbadensis) and their in vitro antioxidative capacity. Planta Med.

(2007) 73(6):599–602. doi: 10.1055/s-2007-967202

121. Iwpshina T, Matsumoto S, Ozawa K, Akuzawa K. Flavone glycosides from

asplenium normale. Phytochemistry. (1990) 29(11):3543–6. doi: 10.1016/0031-9422

(90)85272-H

122. Glasl S, Mucaji P, Werner I, Presser A, Jurenitsch J. Sesquiterpenes and

flavonoid aglycones from a Hungarian taxon of the Achillea millefolium group.

Z Naturforsch. (2002) 57:976–82. doi: 10.1515/znc-2002-11-1203. Available at: www.

znaturforsch.com

123. Kasaj D, Krenn L, Prinzb S, Hüfnerb A, Haslingerb E, Shan Yuc S, et al. Flavonand

flavonolglycosides from A chillea pannonica scheele. Z Naturforsch. (2001) 56:521–5.

doi: 10.1515/znc-2001-7-808. Available at: [www.znaturforsch.com](http://www.znaturforsch.com)

124. Merfort I, Wendisch D. New flavonoid glycosides from Arnicae flos DAB 9.

Planta Med. (1992) 58(4):355–7. doi: 10.1055/s-2006-961484

125. Kim NM, Kim J, Chung HY, Choi JS. Isolation of luteolin 7-O-rutinoside and

esculetin with potential antioxidant activity from the aerial parts of Artemisia

Montana. Arch Pharm Res. (2000) 23(3):237–9. doi: 10.1007/BF02976451

126. Michal W, Monika T, Michal T, Jan G, Iwona W. Antioxidant activity of

extracts and flavonoids from bidens tripartita. Acta Poloniae Pharmaceutica ñ Drug

Research. (2007) 63(5):441–7.

127. Jeong DM, Jung HA, Choi JS. Comparative antioxidant activity and HPLC

profiles of some selected Korean thistles. Arch Pharm Res. (2008) 31(1):28–33.

doi: 10.1007/s12272-008-1116-7

128. Tundis R, Statti G, Menichini F, Delle Monache F. Arctiin and onopordopicrin

from Carduus micropterus ssp. Perspinosus. Fitoterapia. (2000) 71(5):600–1. doi: 10.

1016/S0367-326X(00)00203-3

129. Lee JY, Chang EJ, Kim HJ, Park H, Choi SW. Antioxidative flavonoids from

leaves of Carthamus tinctorius. Arch Pharm Res. (2002) 25(3):313–9. doi: 10.1007/

BF02976632. Available at: <http://apr.psk.or.kr>

130. Diaa Y, August WF. Constituents of the EgyptianGentaurea scoparia; III.

PhenolicConstituents of the aerial parts. Planta Med. (1995) 61:570–3. doi: 10.1055/

s-2006-959378

131. Fonseca FN, Tavares MFM, Horváth C. Capillary electrochromatography of

selected phenolic compounds of Chamomilla recutita. J Chromatogr A. (2007) 1154

(1–2):390–9. doi: 10.1016/j.chroma.2007.03.106

132. Suksamrarn A, Chotipong A, Suavansri T, Boongird S, Tirnsuksai P,

Vimuttipong S, et al. Antimycobacterial activity and cytotoxicity of flavonoids from

the flowers of Chromolaena odorata. Arch Pharm Res. (2004) 27(5):507–11. doi: 10.

1007/BF02980123. Available at: <http://apr.psk.or.kr>

133. Nguyen M, Awale S, Tezuka Y, Tran Q, Watanabe H, Kadota S. Xanthine

oxidase inhibitory activity of Vietnamese medicinal plants. Biol Pharm Bull. (2004)

27(9):1414–21. doi: 10.1248/bpb.27.1414

134. Ganzera M, Pöcher A, Stuppner H, Ganzera M. Differentiation of Cirsium

japonicum and C. setosum by TLC and HPLC-MS. Phytochem Anal. (2005)

16:205–9. doi: 10.1002/pca.846. Available at: [www.interscience.wiley.com](http://www.interscience.wiley.com)

135. Nazaruk J, Gudej J. Flavonoid compounds from the flowers of cirsium rivulare

(JACQ.) all. Acta Pol Pharm. (2003) 60(1):87–9.PMID: 12848373

136. Kong LD, Abliz Z, Zhou CX, Li LJ, Cheng CHK, Tan RX. Glycosides and

xanthine oxidase inhibitors from Conyza bonariensis. Phytochemistry. (2001) 58

(4):645–51. doi: 10.1016/S0031-9422(01)00176-5. Available at: www.elsevier.com/

locate/phytochem

137. Nazaruk J. Flavonoid aglycones and phytosterols from the Erigeron acris

L. Herb. Acta Pol Pharm. (2006) 63(4):317–9. PMID: 17203871

138. Schauss AG, Wu X, Prior RL, Ou B, Patel D, Huang D, et al. Phytochemical

and nutrient composition of the freeze-dried amazonian palm berry, Euterpe

oleraceae mart. (acai). J Agric Food Chem. (2006) 54(22):8598–603. doi: 10.1021/

jf060976g

139. Hsu HF, Houng JY, Chang CL, Wu CC, Chang FR, Wu YC. Antioxidant

activity, cytotoxicity, and DNA information of Glossogyne tenuifolia. J Agric Food

Chem. (2005) 53(15):6117–25. doi: 10.1021/jf050463u

140. Süzgeç S, Meriçli AH, Houghton PJ, Çubukçu B. Flavonoids of Helichrysum

compactum and their antioxidant and antibacterial activity. Fitoterapia. (2005) 76

(2):269–72. doi: 10.1016/j.fitote.2004.12.006

141. Park EJ, Kim Y, Kim J. Acylated flavonol glycosides from the flower of Inula

britannica. J Nat Prod. (2000) 63(1):34–6. doi: 10.1021/np990271r

142. Zhang Y, Chen J, Ma XM, Shi YP. Simultaneous determination of flavonoids in

Ixeridium gracile by micellar electrokinetic chromatography. J Pharm Biomed Anal.

(2007) 45(5):742–6. doi: 10.1016/j.jpba.2007.08.014

143. Ma JY, Wang ZT, Xu LS, Xu GJ. A sesquiterpene lactone glucoside from

Ixeris denticulata f. pinnatipartita. Phytochemistry. (1999) 50:113–5. doi: 10.1016/

S0031-9422(98)00452-X

144. Hou CC, Lin SJ, Cheng JT, Hsu FL. Antidiabetic dimeric guianolides and a

lignan glycoside from Lactuca indica. J Nat Prod. (2003) 66(5):625–9. doi: 10.1021/

np0205349

145. DuPont MS, Mondin Z, Williamson G, Price KR. Effect of variety, processing,

and storage on the flavonoid glycoside content and composition of lettuce endive.

J Agric Food Chem. (2000) 48(9):3957–64. doi: 10.1021/jf0002387

146. Kim DK. Antioxidative components from the aerial parts of Lactuca scariola L.

Arch Pharm Res. (2001) 24(5):427–30. doi: 10.1007/BF02975189

147. Schwaiger S, Seger C, Wiesbauer B, Schneider P, Ellmerer EP, Sturm S, et al.

Development of an HPLC-PAD-MS assay for the identification and quantification

of major phenolic edelweiss (Leontopodium alpium cass.) constituents. Phytochem

Anal. (2006) 17(5):291–8. doi: 10.1002/pca.917

148. Grael CFF, Albuquerque S, Lopes JLC. Chemical constituents of Lychnophora

pohlii and trypanocidal activity of crude plant extracts and of isolated compounds.

Fitoterapia. (2005) 76(1):73–82. doi: 10.1016/j.fitote.2004.10.013

149. Gongora L, Manez S, Giner R, Recio C, Gray A, Rios J. Phenolic glycosides

from Phagnalon rupestre. Phytochemistry. (2002) 59(8):857–60. doi: 10.1016/S0031-

9422(02)00011-0. Available at: [www.elsevier.com/locate/phytochem](http://www.elsevier.com/locate/phytochem)

150. Souleles C, Laskaris G. Flavonoids from Picnomon acarna. Planta Med. (1988)

54(1):47–8. doi: 10.1055/s-2006-962332

151. Cottiglia F, Casu L, Bonsignore L, Casu M, Floris C, Sosa S, et al. Topical antiinflammatory

activity of flavonoids and a new Xanthone from Santolina insularis.

Z Naturforsch. (2005) 60:63–6. doi: 10.1515/znc-2005-1-212. Available at: http://

[www.znaturforsch.com](http://www.znaturforsch.com)

152. Seo CS, Kim JH, Huang DS, Shin HK. Simultaneous determination of seven

compounds in samsoeum by HPLC-PDA. J Orient Med Prescription. (2010) 18

(1):95–103.PMID: 24082332

153. Báthori M, Zupkó I, Hunyadi A, Gácsné-Baitz E, Dinya Z, Forgó P. Monitoring

the antioxidant activity of extracts originated from various Serratula species and

isolation of flavonoids from Serratula coronata. Fitoterapia. (2004) 75(2):162–7.

doi: 10.1016/j.fitote.2003.12.009

154. Ghanta S, Banerjee A, Poddar A, Chattopadhyay S. Oxidative DNA damage

preventive activity and antioxidant potential of Stevia rebaudiana (bertoni) bertoni,

a natural sweetener. J Agric Food Chem. (2007) 55(26):10962–7. doi: 10.1021/

jf071892q

155. Williams CA, Goldstone F, Greenham J. Flavonoids, cinnamic acids and

coumarins from the different tissues and medicinal preparations of taraxacum

officinale. Phytochemistry. (1996) 42(1):121–7. doi: 10.1016/0031-9422(95)

00865-9

156. Ooi LSM, Wang H, He Z, Ooi VEC. Antiviral activities of purified compounds

from Youngia japonica (L.) DC (Asteraceae, Compositae). J Ethnopharmacol. (2006)

106(2):187–91. doi: 10.1016/j.jep.2005.12.028

157. Sharaf M, El-Ansari MA, Saleh NAM. New flavonoids from Äicennia marina.

Fitoterapia. (2000) 71(3):274–7. doi: 10.1016/S0367-326X(99)00169-0

158. Ueda Y, Oku H, Linuma M, Ishiguro K. Effects on blood pressure decrease in

response to PAF of Impatiens textori MIQ. Biol Pharm Bull. (2003) 26(10):1505–7.

doi: 10.1248/bpb.26.1505

159. Liang H-R, Vuorela P, Vuorela H, Hiltunen R. Isolation and

immunomodulatory effect of flavonol glycosides from Epimedium hunanense.

Planta Med. (1997) 63(4):316–9. doi: 10.1055/s-2006-957690

160. Chen CC, Huang YL, Sun CM, Shen CC, Ko FN, Teng CM. New prenylflavones

from the leaves of Epimedium sagittatum. J Nat Prod. (1996) 59(4):412–4. doi: 10.

1021/np9601925

161. Gormann R, Kaloga M, Ferreira D, Marais JPJ, Kolodziej H. Newbouldiosides

A-C, phenylethanoid glycosides from the stem bark of Newbouldia laevis.

Phytochemistry. (2006) 67(8):805–11. doi: 10.1016/j.phytochem.2006.01.016

162. Han HY, Shan S, Zhang X, Wang NL, Lu XP, Yao XS. Down-regulation

of prostate specific antigen in LNCaP cells by flavonoids from the pollen of

Brassica napus L. Phytomedicine. (2007) 14(5):338–43. doi: 10.1016/j.phymed.

2006.09.005

163. Bringmann G, Ochse M, Zotz G, Peters K, Peters EM, Brun R, et al. 6-

Hydroxyluteolin-7-O-(1′′-α-rhamnoside) From Vriesea sanguinolenta cogn. And

marchal (Bromeliaceae). Phytochemistry. (2000) 53(8):965–9. doi: 10.1016/S0031-

9422(99)00550-6. Available at: [www.elsevier.com/locate/phytochem](http://www.elsevier.com/locate/phytochem)

164. Backhouse N, Rosales L, Apablaza C, Goïty L, Erazo S, Negrete R, et al.

Analgesic, anti-inflammatory and antioxidant properties of buddleja globosa,

Buddlejaceae. J Ethnopharmacol. (2008) 116(2):263–9. doi: 10.1016/j.jep.2007.11.025

165. Georges K, Jayaprakasam B, Dalavoy SS, Nair MG. Pest-managing activities of

plant extracts and anthraquinones from Cassia nigricans from Burkina Faso. Bioresour

Technol. (2008) 99(6):2037–45. doi: 10.1016/j.biortech.2007.02.049

166. Tshikalange TE, Meyer JJM, Hussein AA. Antimicrobial activity, toxicity and

the isolation of a bioactive compound from plants used to treat sexually transmitted

diseases. J Ethnopharmacol. (2005) 96(3):515–9. doi: 10.1016/j.jep.2004.09.057

167. Ingkaninan K, Ijzerman AP, Verpoorte R. Luteolin, a compound with

adenosine A1 receptor-binding activity, and chromone and dihydronaphthalenone

constituents from Senna siamea. J Nat Prod. (2000) 63(3):315–7. doi: 10.1021/

np9904152

168. Sudjaroen Y, Haubner R, Würtele G, Hull WE, Erben G, Spiegelhalder B, et al.

Isolation and structure elucidation of phenolic antioxidants from tamarind

(Tamarindus indica L.) seeds and pericarp. Food Chem Toxicol. (2005) 43

(11):1673–82. doi: 10.1016/j.fct.2005.05.013

169. Zhou Y, Wang Y, Wang R, Guo F, Yan C. Two-dimensional liquid

chromatography coupled with mass spectrometry for the analysis of Lobelia

chinensis lour. Using an ESI/APCI multimode ion source. J Sep Sci. (2008) 31

(13):2388–94. doi: 10.1002/jssc.200700685

170. Vanhoenacker G, van Rompaey P, de Keukeleire D, Sandra P.

Chemotaxonomic features associated with flavonoids of cannabinoid-free cannabis

(Cannabis sativa subsp. sativa L.) in relation to hops (Humulus lupulus L.). Nat

Prod Lett. (2002) 16(1):57–63. doi: 10.1080/1057563029001/4863

171. Li Y-Q, Yang S-L, Li H-R, Xu L-Z. Two new alkaloids from Capparis

himalayensis. Chem Pharm Bull. (2008) 56(2):189–91. doi: 10.1248/cpb.56.189

172. Sousa A, Ferreira ICFR, Calhelha R, Andrade PB, Valentão P, Seabra R, et al.

Phenolics and antimicrobial activity of traditional stoned table olives “alcaparra.”.

Bioorg Med Chem. (2006) 14(24):8533–8. doi: 10.1016/j.bmc.2006.08.027

173. Yao X, Jiang G, Chen G. ORIGINAL RESEARCH determination of active

constituents in Lonicera confusa DC. By capillary electrophoresis with

amperometric detection. Biomed Chromatogr. (2006) 20:1192–9. doi: 10.1002/bmc.

684. Available at: [www.interscience.wiley.com](http://www.interscience.wiley.com)

174. Elbandy M, Miyamoto T, Lacaille-Dubois MA. Sulfated lupane triterpene

derivatives and a flavone C-glycoside from Gypsophila repens. Chem Pharm Bull.

(2007) 808(5):808–11. doi: 10.1248/cpb.55.808

175. Li HY, Koike K, Ohmoto T. Triterpenoid saponins from dzanthus chinenszs.

Phytochemistry. (1994) 35(3):751–6. doi: 10.1016/S0031-9422(00)90599-5

176. Andrade-Cetto A, Wiedenfeld H. Hypoglycemic effect of Cecropia

obtusifolia on streptozotocin diabetic rats. J Ethnopharmacol. (2001)

78:145–9. doi: 10.1016/S0378-8741(01)00335-X. Available at: www.elsevier.

com/locate/jethpharm

177. Kandil FE, Grace MH. Polyphenols from Cornulaca monacantha.

Phytochemistry. (2001) 58(4):611–3. doi: 10.1016/S0031-9422(01)00265-5. Available

at: [www.elsevier.com/locate/phytochem](http://www.elsevier.com/locate/phytochem)

178. Rocha L, Marston A, Potterat O, Auxiliadora M, Kaplan C, Stoeckli-Evans H,

et al. Antibacterial phloroglucinols and flavonoids from hypericum brasiliense.

Phytochemistry. (1995) 40(5):1447–52. doi: 10.1016/0031-9422(95)00507-4

179. Jurgenliemk G, Nahrstedt A. Phenolic compounds from Hypericum

perforatum. Planta Med. (2002) 68:88–91. doi: 10.1055/s-2002-20053

180. Sfltlupinar N, Husek A, Potèilová H, Dvofáková S, Hanus V, Sedmerat P, et al.

Alkaloids and phenolics of coichicum cilicicum. Planta Med. (1988) 53(3):243–5.

doi: 10.1055/s-2006-962417

181. Pettit GR, Hoard MS, Doubek DL, Schmidt JM, Pettit RK, Tackett LP, et al.

L. Antineoplastic agents 338. The cancer cell growth inhibitory. Constituents of

Terminalia arjuna (Combretaceae). J Ethnopharmacol. (1996) 53(2):57–63. doi: 10.

1016/S0378-8741(96)01421-3

182. Saleem A, Husheem M, Härkönen BP, Pihlaja K. Inhibition of cancer cell

growth by crude extract and the phenolics of Terminalia chebula retz. Fruit.

J Ethnopharmacol. (2002) 81:327–36. doi: 10.1016/S0378-8741(02)00099-5. Available

at: [www.elsevier.com/locate/jethpharm](http://www.elsevier.com/locate/jethpharm)

183. Marzouk M, El-Toumy S, Moharram F, Shalaby N, Ehmed A.

Pharmacologically active ellagitannins from Terminalia myriocarpa. Planta Med.

(2002) 68:523–7. doi: 10.1055/s-2002-32549

184. Du Q, Xu Y, Li L, Zhao Y, Jerz G, Winterhalter P. Antioxidant constituents in

the fruits of Luffa cylindrica (L.) roem. J Agric Food Chem. (2006) 54(12):4186–90.

doi: 10.1021/jf0604790

185. Siciliano T, de Tommasi N, Morelli I, Braca A. Study of flavonoids of Sechium

edule (jacq) swartz (Cucurbitaceae) different edible organs by liquid chromatography

photodiode array mass spectrometry. J Agric Food Chem. (2004) 52(21):6510–5.

doi: 10.1021/jf040214q

186. Chu Q, Tian X, Lin M, Ye J. Electromigration profiles of Cynomorium

songaricum based on capillary electrophoresis with amperometric detection. J Agric

Food Chem. (2006) 54(21):7979–83. doi: 10.1021/jf061574b

187. Basile A, Sorbo S, Joséantonio Lópezlópez-Saéz J, Castaldo Cobianchi R. Effects

of seven pure flavonoids from mosses on germination and growth of Tortula muralis

HEDW. (bryophyta) and Raphanus sativus L. (magnoliophyta). Phytochemistry.

(2003) 62(7):1145–51. doi: 10.1016/S0031-9422(02)00659-3. Available at: www.

elsevier.com/locate/phytochem

188. Oh H, Kim DH, Cho JH, Kim YC. Hepatoprotective and free radical scavenging

activities of phenolic petrosins and flavonoids isolated from Equisetum arvense.

J Ethnopharmacol. (2004) 95(2–3):421–4. doi: 10.1016/j.jep.2004.08.015

189. Hawas UW. Antioxidant activity of brocchlin carboxylic acid and its methyl

ester from Chrozophora brocchiana. Nat Prod Res. (2007) 21(7):632–40. doi: 10.

1080/14786410701371124

190. Otsuka H, Hirata E, Shinzato T, Takeda Y. Glochiflavanosides A-D: flavanol

glucosides from the leaves of Glochidion zeylanicum (GAERTN) A. JUSS. Chem

Pharm Bull. (2001) 49(7):921–3. doi: 10.1248/cpb.49.921

191. El-Desouky SK, Ryu SY, Kim YK. A new cytotoxic acylated apigenin glucoside

from Phyllanthus emblica L. Nat Prod Res. (2008) 22(1):91–5. doi: 10.1080/

14786410701590236

192. Fu Y, Zu Y, Liu W, Efferth T, Zhang N, Liu X, et al. Optimization of luteolin

separation from pigeonpea [Cajanus cajan (L.) millsp.] leaves by macroporous resins.

J Chromatogr A. (2006) 1137(2):145–52. doi: 10.1016/j.chroma.2006.08.067

193. Mun’im A, Negishi O, Ozawa T. Antioxidative compounds from crotalari

sessiliflora. Biosci Biotechnol Biochem. (2003) 67(2):410–4. doi: 10.1271/bbb.67.410

194. Barreiros ALBS, David JP, de Queiroz LP, David JM. A-type proanthocyanidin

antioxidant from Dioclea lasiophylla. Phytochemistry. (2000) 55(7):805–8. doi: 10.

1016/S0031-9422(00)00297-1. Available at: [www.elsevier.com/locate/phytochem](http://www.elsevier.com/locate/phytochem)

195. Erdem Y, Koichiro T, Yoshihisa T, Kazuyoshi K. Isolation and characterization

of free radical scavenging flavonoid glycosides from the flowers of Spartium junceum

by activity-guided fractionation. J Ethnopharmacol. (2000) 73:471–8. doi: 10.1016/

S0378-8741(00)00327-5. Available at: [www.elsevier.com/locate/jethpharm](http://www.elsevier.com/locate/jethpharm)

196. Mosaddik A, Forster PI, Waterman PG. Three new 3-benzylbenzofuran-2-one

derivatives from Homalium brachybotrys (Flacourtiaceae/Salicaceae s. l.). Nat Prod

Res. (2007) 21(13):1191–8. doi: 10.1080/14786410601130679

197. Reddy SV, Tiwari AK, Kumar US, Rao RJ, Rao JM. Free radical scavenging,

enzyme inhibitory constituents from antidiabetic ayurvedic medicinal plant

Hydnocarpus wightiana blume. Phytother Res. (2005) 19(4):277–81. doi: 10.1002/ptr.1491

198. Orhan DD, Aslan M, Aktay G, Ergun E, Yesilada E, Ergun F. Evaluation of

hepatoprotective effect of Gentiana olivieri herbs on subacute administration and

isolation of active principle. Life Sci. (2003) 72(20):2273–83. doi: 10.1016/S0024-

3205(03)00117-6

199. Wu QX, Li Y, Shi YP. Antioxidant phenolic glucosides from Gentiana piasezkii.

J Asian Nat Prod Res. (2006) 8(5):391–6. doi: 10.1080/10286020500172368

200. Lacaille-Dubois MA, Galle K, Wagner H. Secoiridoids and xanthones from

Gentianella nitida. Planta Med. (1996) 62(4):365–7. doi: 10.1055/s-2006-957908

201. Markham KR, Bloor SJ, Nicholson R, Rivera R, Shemluck M, Kevan PG, et al.

Black flower coloration in wild Lisianthius nigrescens: its chemistry and ecological

consequences. Z Naturforsch. (2004) 59:625–30. doi: 10.1515/znc-2004-9-1003.

Available at: <http://www.znaturforsch.com>

202. Greenham J, Vassiliades DD, Harborne rey B, Williams CA, Eagles J, Grayer RJ,

et al. A distinctive favonoid chemistry for the anomalous genus Biebersteinia.

Phytochemistry. (2001) 56(1):87–91. doi: 10.1016/S0031-9422(00)00355-1. Available

at: [www.elsevier.com/locate/phytochem](http://www.elsevier.com/locate/phytochem)

203. Erhard D, Pohnert G, Gross EM. Chemical defense in Elodea nuttallii reduces

feeding and growth of aquatic herbivorous lepidoptera. J Chem Ecol. (2007) 33

(8):1646–61. doi: 10.1007/s10886-007-9307-0

204. Abdalla MF, Saleh Nabiel AM, Garb S, Abu-Eyta AM, El-Said H. Flavone

glycosides of salua triloba. Phytochemistry. (1983) 22(9):2057–60. doi: 10.1016/0031-

9422(83)80044-2

205. Yamauchi H, Kakuda R, Yaoita Y, Machida K, Kikuchi M. Two new glycosides

from the whole plants of Glechoma hederacea L. Chem Pharm Bull. (2007) 55

(2):346–7. doi: 10.1248/cpb.55.346

206. Woo ER, Piao MS. Antioxidative constituents from Lycopus lucidus. Arch

Pharm Res. (2004) 27(2):173–6. doi: 10.1007/BF02980102

207. Epidmnidij S, Coli E, Pneumoniae K, Wlgarij P, Aenrginosa P. Antibacterial

activity studies of flavonoids from salvla palaestzna. J Nat Prod. (1983) 46(6):874–5.

doi: 10.1021/np50030a007

208. Ulubelen A, Topcu G, Eris C, Sonmez U, Kartal M, Kurucu S, et al. Terpenoids

from salvia sclarea. Phytochemistry. (1994) 36(4):971–4. doi: 10.1016/S0031-9422(00)

90474-6

209. Nikolova M, Asenov A. Surface flavonoid aglycones in newly studied plant

species. Nat Prod Res. (2006) 20(1):103–6. doi: 10.1080/14786410500046463

210. Jung MJ, Kang SS, Jung HA, Kim J, Choi JS. Isolation of flavonoids and a

cerebroside from the stem bark of albizzia julibrissin. Arch Pharm Res. (2004) 27

(6):593–9. doi: 10.1007/BF02980155

211. Tewtrakul S, Miyashiro H, Nakamura N, Hattori M, Kawahata T, Otake T, et al.

HIV-1 integrase inhibitory substances from Coleus parvifolius. Phytother Res. (2003)

17(3):232–9. doi: 10.1002/ptr.1111

212. Saeidnia S, Gohari AR, Ito M, Kiuchi F, Honda G. Bioactive constituents from

Dracocephalum subcapitatum (O. Kuntze) Lipsky. Z Naturforsch. (2005) 60:22–4.

doi: 10.1515/znc-2005-1-204. Available at: <http://www.znaturforsch.com>

213. Wang FM, Yao TW, Zeng S, Zeng S. Analysis of luteolin in Elsholtzia blanda

benth. By RP-HPLC. Pharmazie. (2005) 60(9):648–9. PMID: 16222861

214. Liu AL, Liu B, Qin HL, Lee SMY, Wang YT, Du GH. Anti-influenza virus

activities of flavonoids from the medicinal plant Elsholtzia rugulosa. Planta Med.

(2008) 74(8):847–51. doi: 10.1055/s-2008-1074558

215. Luo M, Lu H, Ma H, Zhao L, Liu X, Jiang S. Separation and determination of

flavonoids in lamiophlomis rotata by capillary electrophoresis using borate as

electrolyte. J Pharm Biomed Anal. (2007) 44(4):881–6. doi: 10.1016/j.jpba.2007.04.010

216. Gabriel C, Kokkalou E. A new acetylated glucoside of luteolin and two flavone

glucosides from Lavandula stoechas ssp. stoechas. Pharmazie. (2003) 58(6):426–7.

PMID: 12857010

217. Parejo I, Caprai E, Bastida J, Viladomat F, Jáuregui O, Codina C. Investigation

of Lepechinia graveolens for its antioxidant activity and phenolic composition.

J Ethnopharmacol. (2004) 94(1):175–84. doi: 10.1016/j.jep.2004.05.017

218. Gumbinger H G, Winterhoff H, Wylde R, Sosa A. On the influence of the sugar

moiety on the antigonadotropic activity of luteoline glycosides. Planta Med. (1992) 58

(1):49–50. doi: 10.1055/s-2006-961388

219. Bucar F, Kartnig T. Flavone glucuronides of Lycopus virginicus. Planta Med.

(1995) 61(4):378–80. doi: 10.1055/s-2006-958111

220. Modnicki D, Tokar M, Klimek B. Flavonoids and phenolic acids of Nepeta

cataria L. Var. citriodora (becker) balb. (Lamiaceae). Acta Pol Pharm. (2007) 64

(3):247–52. PMID: 17695148

221. Vieira RF, Grayer RJ, Paton A, Simon JE, Simon JE. Genetic diversity of

Ocimum gratissimum L. Based on volatile oil constituents, flavonoids and RAPD

markers. Biochem Syst Ecol. (2001) 29(3):287–304. doi: 10.1016/S0305-1978(00)

00062-4

222. Koukoulitsa C, Karioti A, Bergonzi MC, Pescitelli G, di Bari L, Skaltsa H. Polar

constituents from the aerial parts of Origanum vulgare L. Ssp. hirtum growing wild in

Greece. J Agric Food Chem. (2006) 54(15):5388–92. doi: 10.1021/jf061477i

223. Yoshida K, Kameda K, Kondot T. Diglucuronoflavones from purple leaves of

perilla ocimoides. Phytochemistry. (1993) 33(4):917–9. doi: 10.1016/0031-9422(93)

85304-A

224. Kamel MS, Mohamed KM, Hassanean HA, Ohtani K, Kasai R, Yamasaki K.

Iridoid and megastigmane glycosides from Phlomis aurea. Phytochemistry. (2000)

55(4):353–7. doi: 10.1016/S0031-9422(00)00331-9. Available at: www.elsevier.com/

locate/phytochem

225. Kirmizibekmez H, Çalis I, Perozzo R, Brun R, Dönmez AA, Linden A, et al.

Inhibiting activities of the secondary metabolites of Phlomis brunneogaleata against

parasitic protozoa and plasmodial enoyl-ACP reductase, a crucial enzyme in fatty

acid biosynthesis. Planta Med. (2004) 70(8):711–7. doi: 10.1055/s-2004-827200

226. Çaliş I, Kirmizibekmez H. Glycosides from Phlomis lunariifolia.

Phytochemistry. (2004) 65(18):2619–25. doi: 10.1016/j.phytochem.2004.04.038

227. Snchezde Rojas VR, Somoza B, ViIlar AM. Isolation of vasodilatory active

flavonoids from the traditional remedy Satureja obovata. Planta Med. (1995) 62:272–4.

doi: 10.1055/s-2006-957876.

228. Yoshitera O, Shotaro T, Hiroshi H. Schizonodiol, schizonol, and

schizonepetosides D and E, monoterpenoids of schizonepeta tenuifolia spikes.

Planta Med. (1989) 55:179–80. doi: 10.1055/s-2006-961918

229. Sato Y, Suzaki S, Nishikawa T, Kihara M, Shibata H, Higuti T. Phytochemical

flavones isolated from Scutellaria barbata and antibacterial activity against methicillinresistant

Staphylococcus aureus. J Ethnopharmacol. (2000) 72(3):483–8. doi: 10.1016/

S0378-8741(00)00265-8. Available at: [www.elsevier.com/locate/jethpharm](http://www.elsevier.com/locate/jethpharm)

230. Kadifkova Panovska T, Kulevanova S, Stefova M. In vitro antioxidant activity of

some Teucrium species (Lamiaceae). Acta Pharm. (2005) 55:207–14. PMID: 16179134

231. Dapkevicius A, van Beek TA, Lelyveld GP, van Veldhuizen A, de Groot A,

Linssen JPH, et al. Isolation and structure elucidation of radical scavengers from

Thymus vulgaris leaves. J Nat Prod. (2002) 65(6):892–6. doi: 10.1021/np010636j

232. Ismaili H, Tortora S, Sosa S, Fkih-Tetouani S, Ilidrissi A, Loggia RD, et al.

Topical anti-inflammatory activity of Thymus willdenowii. J Pharm Pharmacol.

(2001) 53(12):1645–52. doi: 10.1211/0022357011778250

233. Hu Y, Hou TT, Zhang QY, Xin HL, Zheng HC, Qin LP, et al. Evaluation of the

estrogenic activity of the constituents in the fruits of Vitex rotundifolia L. For the

potential treatment of premenstrual syndrome. J Pharm Pharmacol. (2007) 59

(9):1307–12. doi: 10.1211/jpp.59.9.0016

234. Shaiq Ali M, Saleem M, Ali Z, Uddin Ahmad V. Chemistry of Zataria

multiflora (Lamiaceae). Phytochemistry. (2000) 55(8):933–6. doi: 10.1016/S0031-

9422(00)00249-1. Available at: [www.elsevier.com/locate/phytochem](http://www.elsevier.com/locate/phytochem)

235. Miñ J, Acevedo C, Moscatelli V, Ferraro G, Hnatyszyn O. Antinociceptive effect

of the aqueous extract of Balbisia calycina. J Ethnopharmacol. (2002) 79(2):179–82.

doi: 10.1016/S0378-8741(01)00372-5. Available at: www.elsevier.com/locate/

jethpharm

236. Kamara BI, Brand DJ, Brandt EV, Joubert E. Phenolic metabolites from

honeybush tea (Cyclopia subternata). J Agric Food Chem. (2004) 52(17):5391–5.

doi: 10.1021/jf040097z

237. Pistelli L, Giachi I, Potenza D, Morelli I. A new isoflavone from Genista corsica.

J Nat Prod. (2000) 63(4):504–6. doi: 10.1021/np990282k

238. Rauter AP, Martins A, Borges C, Ferreira J, Justino J, Bronze MR, et al. Liquid

chromatography-diode array detection-electrospray ionisation mass spectrometry/

nuclear magnetic resonance analyses of the anti-hyperglycemic flavonoid extract of

Genista tenera: structure elucidation of a flavonoid-C-glycoside. J Chromatogr A.

(2005) 1089(1–2):59–64. doi: 10.1016/j.chroma.2005.06.046

239. Boué SM, Carter-Wientjes CH, Shih BY, Cleveland TE. Identification of flavone

aglycones and glycosides in soybean pods by liquid chromatography-tandem mass

spectrometry. J Chromatogr A. (2003) 991(1):61–8. doi: 10.1016/S0021-9673(03)

00209-7

240. Park K, Lee S, Min B, Lee K, Choi J, Chung S, et al. Inhibitory effect of luteolin

4-O-glucoside from Kummerowia striata and other flavonoids on interleukin-5

bioactivity. Planta Med. (1999) 65(5):457–9. doi: 10.1055/s-2006-960812

241. Kowalska I, Stochmal A, Kapusta I, Janda B, Pizza C, Piacente S, et al.

Flavonoids from barrel medic (Medicago truncatula) aerial parts. J Agric Food

Chem. (2007) 55(7):2645–52. doi: 10.1021/jf063635b

242. Kassem M, Mosharrafa SA, Saleh NAM, Abdel-Wahab SM. Two new

flavonoids from Retama raetam. Fitoterapia. (2000) 71:649–54. doi: 10.1016/S0367-

326X(00)00224-0

243. Lopez-Lazaro M, Cordero-Martin C, Ayuso J. Flavonoids of Retama

sphaerocarpa. Planta Med. (1999) 65:777–8. doi: 10.1055/s-2006-960869

244. Mikhaeil BR, Badria FA, Maatooq GT, Amer MMA. Antioxidant and

immunomodulatory constituents of henna leaves. Z Naturforsch. (2004) 59:468–76.

doi: 10.1515/znc-2004-7-803. Available at: <http://www.znaturforsch.com>

245. Rauha J, Wolfender J, Salminen J, Pihlaja K, Hostettmann K, Vuorela H.

Characterization of the polyphenolic composition of purple loosestrife (Lythrum

salicaria). Z Naturforsch C J Biosci. (2001) 56:13–20. doi: 10.1515/znc-2001-1-203.

Available at: [www.znaturforsch.com](http://www.znaturforsch.com)

246. van Elswijk DA, Schobel UP, Lansky EP, Irth H, van der Greef J. Rapid

dereplication of estrogenic compounds in pomegranate (Punica granatum) using

on-line biochemical detection coupled to mass spectrometry. Phytochemistry. (2004)

65(2):233–41. doi: 10.1016/j.phytochem.2003.07.001

247. Matlawska I, Sikorska M. Flavonoid compounds in the flowers of Abutilon

indicum L. Sweet (Malvaceae). Acta Pol Pharm. (2002) 59(3):227–9. PMID: 12230251

248. Matlawska I. Flavonoid compounds in the flowers of Kitaibelia vitifolia willd.

(Malvaceae). Acta Pol Pharm. (2001) 58(2):127–31. PMID: 11501790

249. Markham KR, Porter LJ. Isoscutellarein and hypolaetin 8-glucuronides from

the liverwort marchantia berteroana. Phytochemistry. (1975) 14(4):109–1097.

doi: 10.1016/0031-9422(75)85194-6

250. Iwashina T, Kitajima J, Kato T, Tobe H. An analysis of flavonoid compounds in

leaves of japonolirion (Petrosaviaceae). J Plant Res. (2005) 118(1):31–6. doi: 10.1007/

s10265-005-0194-6

251. Markham KR. A “flavone-polysaccharide” redefined as a mixture of 6-

methoxyluteolin penta- and hexa-O-glycosides. Phytochemistry. (2003) 63

(5):589–95. doi: 10.1016/S0031-9422(03)00199-7

252. Tih AE, Ghogomu RT, Sondengam BL, Caux C, Bodo B. Minor

biflavonoids from lophira alata leaves. J Nat Prod. (2006) 69(8):1206–8.

doi: 10.1021/np050169w

253. Pieroni A, Pachaly P. An ethnopharmacological study on common privet

(ligustrum vulgare) and phillyrea (phillyrea latifolia). Fitoterapia. (2000) 71:89–94.

doi: 10.1016/S0367-326X(00)00182-9

254. Lin YL, Shen CC, Huang YJ, Chang YY. Homoflavonoids from Ophioglossum

petiolatum. J Nat Prod. (2005) 68(3):381–4. doi: 10.1021/np0401819

255. Williams CA. The leaf flavonoids of the Orchidaceae. Phytochemistry. (1979) 18

(5):803–13. doi: 10.1016/0031-9422(79)80019-9

256. Mizokami H, Tomita-Yokotani K, Yoshitama K. Flavonoids in the leaves of

oxalis corniculata and sequestration of the flavonoids in the wing scales of the pale

grass blue butterfly, pseudozizeeria maha. J Plant Res. (2008) 121(1):133–6. doi: 10.

1007/s10265-007-0132-x

257. Wang X, Cheng C, Sun Q, Li F, Liu J, Zheng C. Isolation and purification of

four flavonoid constituents from the flowers of paeonia suffruticosa by high-speed

counter-current chromatography. J Chromatogr A. (2005) 1075(1–2):127–31.

doi: 10.1016/j.chroma.2005.04.017

258. Hillenbrand M, Zapp J, Becker H. Depsides from the petals of Papaver rhoeas.

Planta Med. (2004) 70(4):380–2. doi: 10.1055/s-2004-818956

259. Ferreres F, Sousa C, Valentão P, Andrade PB, Seabra RM, Gil-Izquierdo

Á. New C-deoxyhexosyl flavones and antioxidant properties of Passiflora

edulis leaf extract. J Agric Food Chem. (2007) 55(25):10187–93. doi: 10.1021/

jf072119y

260. Pereira M, Campos DE, Filho VC, Zanoni R, Silva DA, Yunes RA, et al.

Evaluation of antifungal activity of Piper solmsianum C. DC. Var. solmsianum

(Piperaceae). Biol Pharm Bull. (2005) 28(8):1527–30. doi: 10.1248/bpb.28.1527

261. Domínguez M, Marín JC, Esquivel B, Céspedes CL. Pensteminoside, an unusual

catalpol-type iridoid from penstemon gentianoides HBK (Plantaginaceae).

Phytochemistry. (2007) 68(13):1762–6. doi: 10.1016/j.phytochem.2007.03.035

262. Fleer H, Verspohl EJ. Antispasmodic activity of an extract from Plantago

lanceolata L. And some isolated compounds. Phytomedicine. (2007) 14(6):409–15.

doi: 10.1016/j.phymed.2006.05.006

263. Davey MP, Bryant DN, Cummins I, Ashenden TW, Gates P, Baxter R, et al.

Effects of elevated CO2 on the vasculature and phenolic secondary metabolism of

Plantago maritima. Phytochemistry. (2004) 65(15):2197–204. doi: 10.1016/j.

phytochem.2004.06.016

264. Cheel J, Theoduloz C, Rodríguez J, Schmeda-Hirschmann G. Free radical

scavengers and antioxidants from lemongrass (Cymbopogon citratus (DC. Stapf.).

J Agric Food Chem. (2005) 53(7):2511–7. doi: 10.1021/jf0479766

265. Sartelet H, Aguie-Aguie G, Martiny L, Haye B. Flavonoids extracted from fonio

millet (Digitaria exilis) reveal potent antithyroid properties. Nutrition. (1996) 12

(2):100–6. doi: 10.1016/0899-9007(96)90707-8

266. Watanabe M. Antioxidative phenolic compounds from Japanese barnyard

millet (Echinochloa utilis) grains. J Agric Food Chem. (1999) 47(11):4500–5. doi: 10.

1021/jf990498s

267. Wang GJ, Chen YM, Wang TM, Lee CK, Chen KJ, Lee TH. Flavonoids with

iNOS inhibitory activity from Pogonatherum crinitum. J Ethnopharmacol. (2008)

118(1):71–8. doi: 10.1016/j.jep.2008.03.005

268. Colombo R, Yariwake JH, Queiroz EF, Ndjoko K, Hostettmann K. On-line

identification of further flavone C- and O-glycosides from sugarcane (Saccharum

officinarum L., gramineae) by HPLC-UV-MS. Phytochem Anal. (2006) 17

(5):337–43. doi: 10.1002/pca.923

269. Murakami S, Takahara H, Shiraiwa M. Purification and characterization of

three neutral extracellular isoperoxidases from rye leaves. Phytochemistry. (2007) 68

(6):777–84. doi: 10.1016/j.phytochem.2006.11.015

270. Kwon YS, Kim EY, Kim J, Kim K, Kim CM. Antioxidant constituents from

Setaria viridis. Arch Pharm Res. (2002) 25(3):300–5. doi: 10.1007/BF02976630.

Available at: <http://apr.psk.or.kr>

271. Cavaliere C, Foglia P, Pastorini E, Samperi R, Laganà A. Identification and

mass spectrometric characterization of glycosylated flavonoids in Triticum durum

plants by high-performance liquid chromatography with tandem mass

spectrometry. Rapid Commun Mass Spectrom. (2005) 19(21):3143–58. doi: 10.1002/

rcm.2185

272. Dietrych-Szostak D, Oleszek W. Effect of processing on the flavonoid content

in buckwheat (Fagopyrum esculentum moench) grain. J Agric Food Chem. (1999) 47

(10):4384–7. doi: 10.1021/jf990121m

273. Park CW, Kim MH, Park JH, Park CW. Flavonoid chemistry of Fallopia section

Fallopia (Polygonaceae). Biochem Syst Ecol. (2000) 28:433–41. doi: 10.1016/S0305-

1978(99)00084-8

274. Waridel P, Wolfender JL, Lachavanne JB, Hostettmann K. Identification of the

polar constituents of Potamogeton species by HPLC-UV with post-column

derivatization, HPLC-MS n and HPLC-NMR, and isolation of a new ent-labdane

diglycoside. Phytochemistry. (2004) 65(16):2401–10. doi: 10.1016/j.phytochem.2004.

06.031

275. Chen SB, Gao GY, Leung HW, Yeung HW, Yang JS, Xiao PG. Aquiledine and

isoaquiledine, novel flavonoid alkaloids from Aquilegia ecalcarata. J Nat Prod. (2001)

64(1):85–7. doi: 10.1021/np000256i

276. Tomczyk M, Gudej J, Sochacki M. Flavonoids from Ficaria verna huds.

Z Naturforsch. (2002) 57:440–4. doi: 10.1515/znc-2002-5-606. Available at: www.

znaturforsch.com

277. Ringl A, Prinz S, Huefner A, Kurzmann M, Kopp B. Chemosystematic value of

flavonoids from Crataegus x macrocarpa (Rosaceae) with special emphasis on (R)-and

(S)-eriodictyol-7-O-glucuronide and luteolin-7-O-glucuronide. Chem Biodivers.

(2007) 4(2):154–62. doi: 10.1002/cbdv.200790020

278. Xue P, Zhao Y, Wang B, Liang H. Simultaneous determination of seven

flavonoids in ptentilla multifida HPLC. J Chromatogr Sci. (2007) 45(4):216-9.

doi: 10.1093/chromsci/45.4.216

279. Lin CF, Ni CL, Huang YL, Sheu SJ, Chen CC. Lignans and anthraquinones

from the fruits of morinda citrifolia. Nat Prod Res. (2007) 21(13):1199–204. doi: 10.

1080/14786410601132451

280. Cimanga RK, Kambu K, Tona L, Hermans N, Apers S, Totté J, et al.

Cytotoxicity and in vitro susceptibility of entamoeba histolytica to morinda

morindoides leaf extracts and its isolated constituents. J Ethnopharmacol. (2006)

107(1):83–90. doi: 10.1016/j.jep.2006.02.010

281. Gattuso G, Caristi C, Gargiulli C, Bellocco E, Toscano G, Leuzzi U. Flavonoid

glycosides in bergamot juice (Citrus bergamia risso). J Agric Food Chem. (2006) 54

(11):3929–35. doi: 10.1021/jf060348z

282. Min YS, Bai KL, Yim SH, Lee YJ, Song HJ, Kim JH, et al. The effect of luteolin-

7-O-13-D-glucuronopyranoside on gastritis and esophagitis in rats. Arch Pharm Res.

(2006) 29(6):484–9. doi: 10.1007/BF02969421. Available at: <http://apr.psk.or.kr>

283. Hoffmann-Bohm K, Lotter H, Seligmann O, Wagner H. Antihepatotoxic Cglycosylflavones

from the leaves of allophyllus edulis var. edulis and gracilis. Planta

Med. (1992) 58(6):544–8. doi: 10.1055/s-2006-961546

284. Kong LD, Wolfender JL, Cheng CH, Hostettmann K, Xiang Tan R. Xanthine

oxidase inhibitors from brandisia hancel. Planta Med. (1999) 65(8):744–6. doi: 10.

1055/s-2006-960854

285. Gonzalez AG, Breton JL, Navarro E, Trujillo J, Boada J, Rodriguez R.

Phytochemical study of isoplexis chalcantha. Planta Med. (1985) 51(1):9–11.

doi: 10.1055/s-2007-969379

286. Hiremath S, Hanumantha Rae S. Antifertility efficacy of the plant etriga lutea

(scrophulariacae) on rats. Contraception. (1990) 42(4) 467-477. doi: 10.1016/0010-7824(90)90053-X

287. Hiremath SP, Badami S, Hunasagatta SK, Patil SB. Antifertility and hormonal

properties of flavones of striga orobanchioides. Eur J Pharmacol. (2000) 391:193–7.

doi: 10.1016/S0014-2999(99)00723-2. Available at: [www.elsevier.nlrlocaterejphar](http://www.elsevier.nlrlocaterejphar)

288. Shindo K, Saito E, Sekiya M, Matsui T, Koike Y. Antioxidative activity of the flower

of Torenia fournieri. J Nat Med. (2008) 62(2):247–8. doi: 10.1007/s11418-007-0207-y

289. Saracoglu I, Varel M, Harput US, Nagatsu A. Acylated flavonoids and phenol

glycosides from Veronica thymoides subsp. pseudocinerea. Phytochemistry. (2004) 65

(16):2379–85. doi: 10.1016/j.phytochem.2004.05.011

290. Loizzo MR, Said A, Tundis R, Rashed K, Statti GA, Hufner A, et al. Inhibition

of angiotensin converting enzyme (ACE) by flavonoids isolated from Ailanthus excelsa

(roxb) (Simaroubaceae). Phytother Res. (2007) 21(27):32–6. doi: 10.1002/ptr.2008.

Available at: [www.interscience.wiley.com](http://www.interscience.wiley.com)

291. Sánchez-Rabaneda F, Jáuregui O, Casals I, Andrés-Lacueva C, Izquierdo-

Pulido M, Lamuela-Raventós RM. Liquid chromatographic/electrospray

ionization tandem mass spectrometric study of the phenolic composition of

cocoa (Theobroma cacao). J Mass Spectrom. (2003) 38(1):35–42. doi: 10.

1002/jms.395

292. Park BY, Min BS, Oh SR, Kim JH, Bae KH, Lee HK. Isolation of flavonoids, a

biscoumarin and an amide from the flower buds of Daphne genkwa and the evaluation

of their anti-complement activity. Phytother Res. (2006) 20:610–3. doi: 10.1002/ptr.

1915. Available at: [www.interscience.wiley.com](http://www.interscience.wiley.com)

293. Nowik W. HPLC-PDA characterisation of Daphne gnidium L. (thymemeacea)

dyeing extracts using two different C-18 stationary phases. J Sep Sci. (2005) 28

(13):1595–600. doi: 10.1002/jssc.200401770

294. Ferrari J, Terreaux C, Sahpaz S, Msonthi JD, Wolfender JL, Hostettmann K.

Benzophenone glycosides from Gnidia involucrata. Phytochemistry. (2000) 54

(8):883–9. doi: 10.1016/S0031-9422(00)00046-7. Available at: www.elsevier.com/

locate/phytochem

295. Zhao J, Pawar RS, Ali Z, Khan IA. Phytochemical investigation of turnera

diffusa. J Nat Prod. (2007) 70(2):289–92. doi: 10.1021/np060253r

296. Kim JS, Kim JC, Shim SH, Lee EJ, Jin W, Bae K, et al. Chemical

constituents of the root of Dystaenia takeshimana and their anti-inflammatory

activity. Arch Pharm Res. (2006) 29(8):617–23. doi: 10.1007/BF02968244.

Available at: http://apr.psk.or.kr
